# Supplementary material
Source: Springer Nature journal article supplement (https://hal.science/hal-01290561v1/file/13567_2013_368_MOESM7_ESM.pdf)

A)

| Antigen | CTL epitope                           | BoLA allele | False positive fraction |
|---------|---------------------------------------|-------------|-------------------------|
| Tp5     | <sup>87</sup> SKADVIAKY <sub>95</sub> | 1*02301     | 0.017                   |
| Tp5     | <sup>87</sup> SKADVIAKY <sub>95</sub> | BoLA-T5     | 0.005                   |

B)

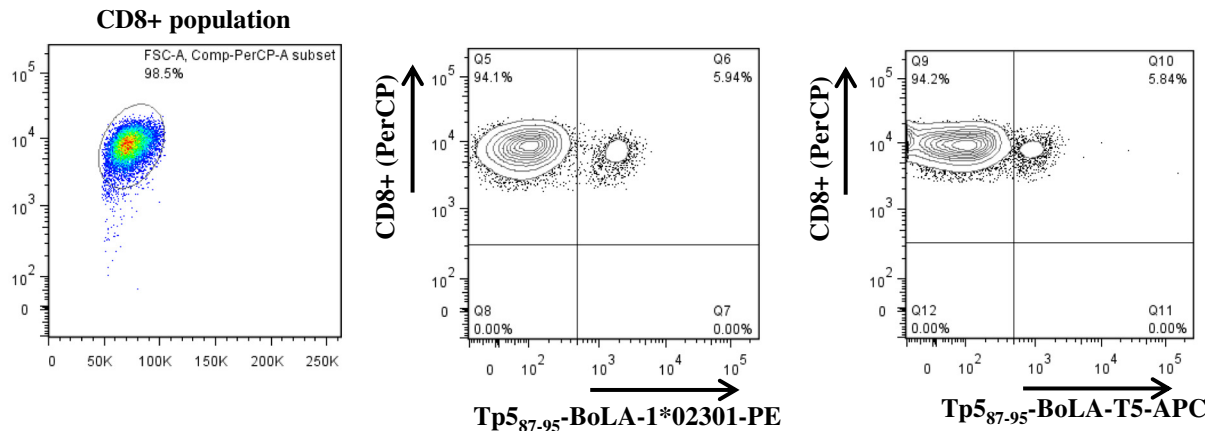

C)

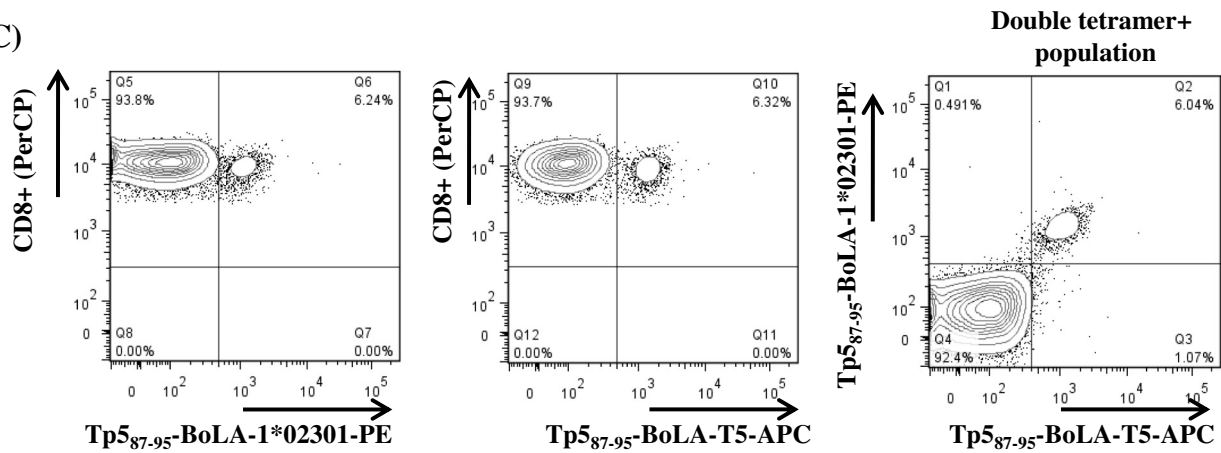

Supplement: MOESM7 [file 13567_2013_368_MOESM7_ESM.pdf]
